# Supplementary material
Source: PubMed Central journal article supplement (PMC3749717)
Supplement: Supp_Fig1.pdf [file Supp_Fig1.pdf]

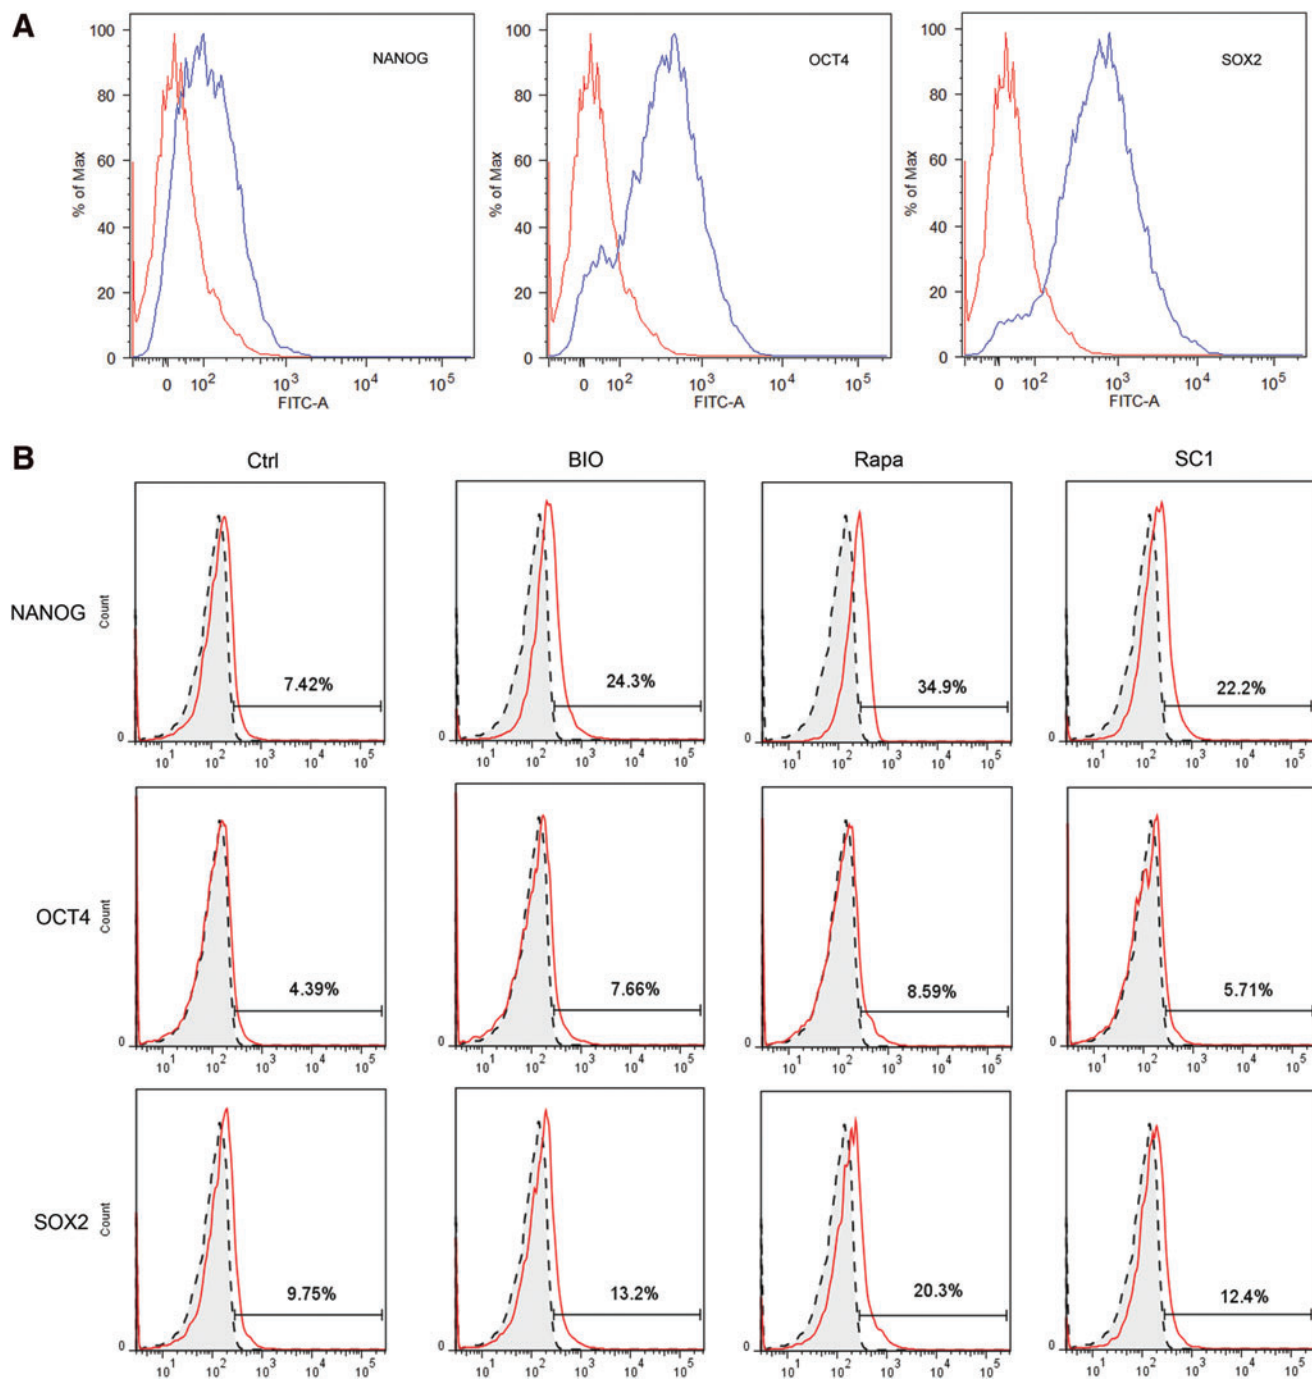

**SUPPLEMENTARY FIG. S1.** Flow cytometry analysis of pluripotency-associated gene expression. **(A)** Expression of NANOG, OCT4, and SOX2 by untreated human embryonic stem cells H9, which were used as a positive control. *Blue peaks:* antibody staining; *red peaks:* isotype control. **(B)** Representative data of the expression of NANOG, OCT4, and SOX2 by dental pulp stem cells (DPSCs) (p3) after 5 days of small molecule treatments. *Shaded peaks:* isotype controls; *red peaks:* antibody staining. The data were organized into bar charts shown in Fig. 3A.
