# Supplementary material
Source: PubMed Central journal article supplement (PMC3749717)
Supplement: Supp_Fig2.pdf [file Supp_Fig2.pdf]

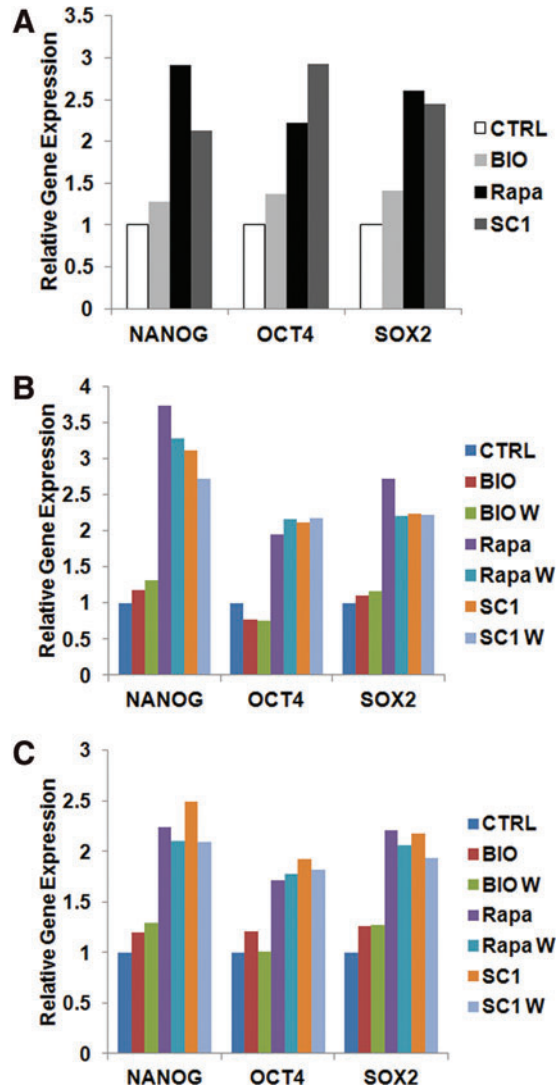

**SUPPLEMENTARY FIG. S2.** Flow cytometry analysis of pluripotency-associated gene expression by DPSCs after small molecule treatments and after withdrawal of small molecules. **(A)** Expression of NANOG, OCT4, and SOX2 by DPSCs (p4) after 5 days of small molecule treatment. The same DPSCs then continued to grow in cultures without the presence of small molecules and the expression of pluripotency-associated genes measured at p7 **(B)** and at p10 **(C)**. The small molecule withdrawal groups were compared to their own control at each passage for data calculation. The control cells were expanded from p4 control DPSCs except no dimethyl sulfoxide (DMSO) was used after small molecule withdrawal.
