# Supplementary material
Source: PubMed Central journal article supplement (PMC3749717)
Supplement: Supp_Fig3.pdf [file Supp_Fig3.pdf]

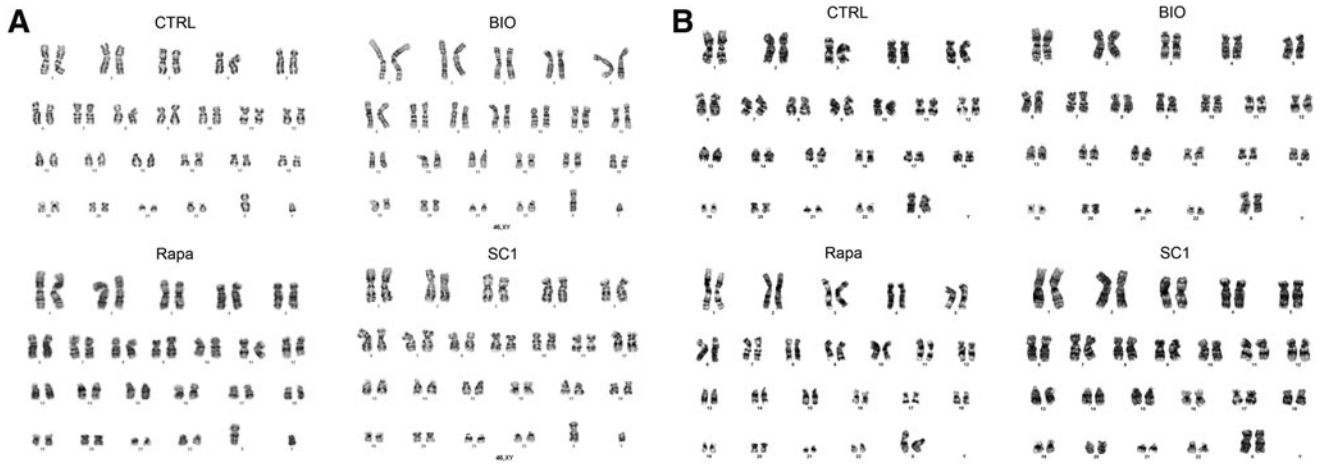

**SUPPLEMENTARY FIG. S3.** Karyotyping of DPSCs treated by small molecules. **(A)** DPSCs from a 13-year-old male cultured at p3 were treated by small molecules (CTRL with DMSO only; 6-bromoindirubin-3-oxime at 100 nM; Rapa at 900 nM; SC1 at 300 nM) for 7 days before being processed for karyotyping. **(B)** DPSCs from an 18-year-old female cultured at p3 were treated by small molecules at the same respective concentrations as in **(A)** for 5 days before processed for karyotyping.
